# Supplementary material for: Systemic application of bone-targeting peptidoglycan hydrolases as a novel treatment approach for staphylococcal bone infection
Source: PubMed Central journal article supplement (PMC10653945; doi:10.1128/mbio.01830-23), 2023-09-28
Supplement: mbio.01830-23-s0002.pdf [file mbio.01830-23-s0002.pdf]

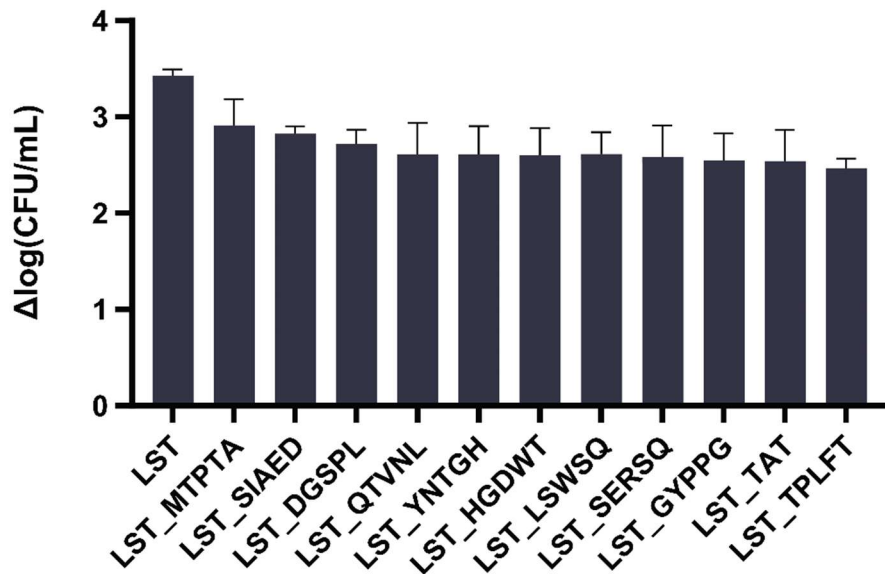

**Supplementary Figure S2: Comparison of the activity of parental LST and LST fused to CPHP candidates.** *S. aureus* Cowan I ( $10^6$  CFU/mL) in cell culture medium (AMEM) was treated with 20 nM enzyme for 120 minutes. Surviving bacteria were enumerated by plating and the average log(CFU/mL) reduction compared to the untreated control was determined ( $\pm$  SEM) from biological triplicates. No significant differences were observed for the modified constructs as compared to the unmodified LST.
