# Supplementary material for: Systemic application of bone-targeting peptidoglycan hydrolases as a novel treatment approach for staphylococcal bone infection
Source: PubMed Central journal article supplement (PMC10653945; doi:10.1128/mbio.01830-23), 2023-09-28
Supplement: mbio.01830-23-s0003.pdf [file mbio.01830-23-s0003.pdf]

### ATBTA-Eu

TOF MS ES+  
1.78e6

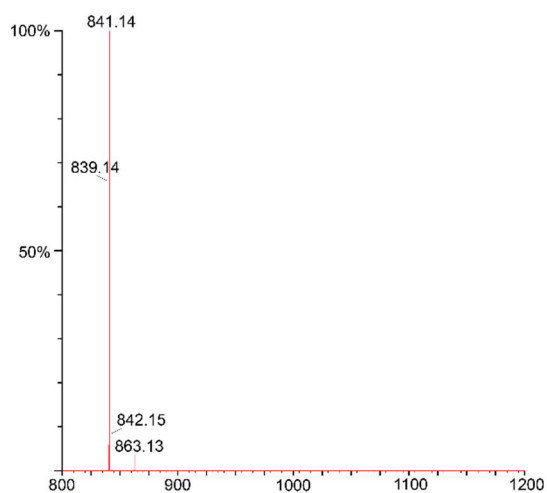

### DTBTA-Eu

TOF MS ES+  
1.63e6

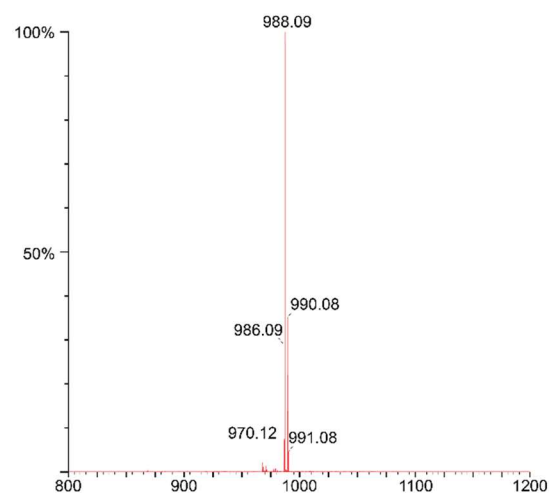

**Supplementary Figure S3: Conversion of ATBTA-Eu<sup>3+</sup> to DTBTA-Eu<sup>3+</sup> was verified by ESI-MS.** ATBTA-Eu<sup>3+</sup> (left, 861.5 (M - H<sup>+</sup>), 839.5 (M - Na<sup>+</sup>)) was chemically converted to the activated DTBTA-Eu<sup>3+</sup> (right, 1008.3 (M - H<sup>+</sup>), 986.3 (M - Na<sup>+</sup>), 968.3 (M - H<sub>2</sub>O)), which was used to label LST and LST\_CPHPs for biodistribution experiments. The mass spectrum on the right confirms complete conversion of the label and was chosen as a representative sample for each batch of activated DTBTA-Eu<sup>3+</sup> produced for this study.
