# Supplementary material for: Systemic application of bone-targeting peptidoglycan hydrolases as a novel treatment approach for staphylococcal bone infection
Source: PubMed Central journal article supplement (PMC10653945; doi:10.1128/mbio.01830-23), 2023-09-28
Supplement: mbio.01830-23-s0004.pdf [file mbio.01830-23-s0004.pdf]

**A**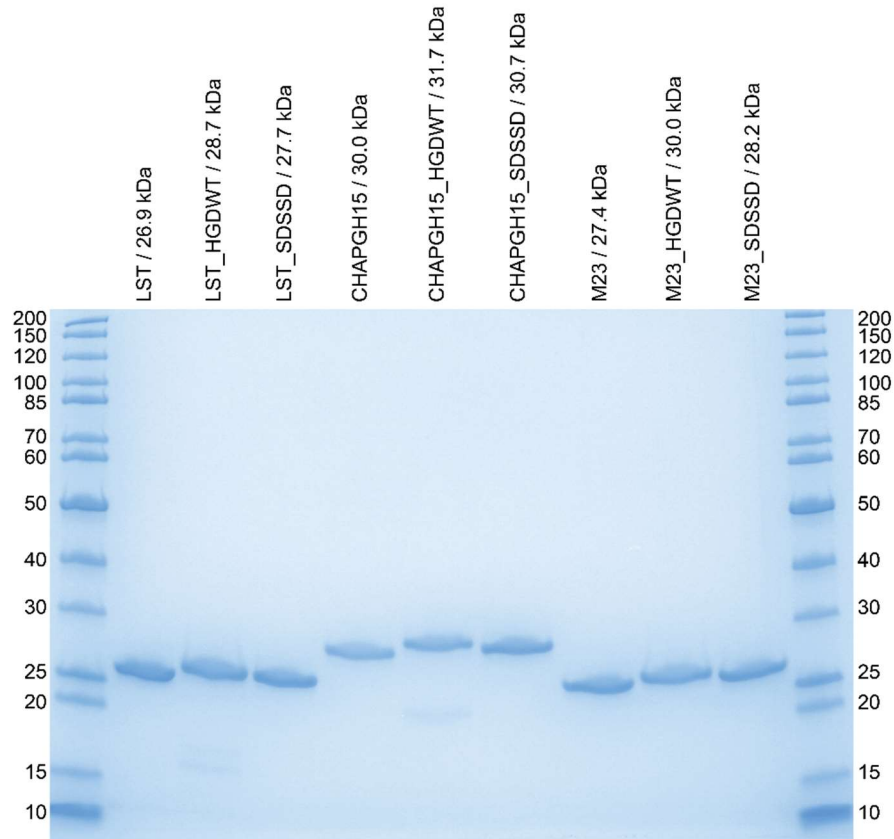**B**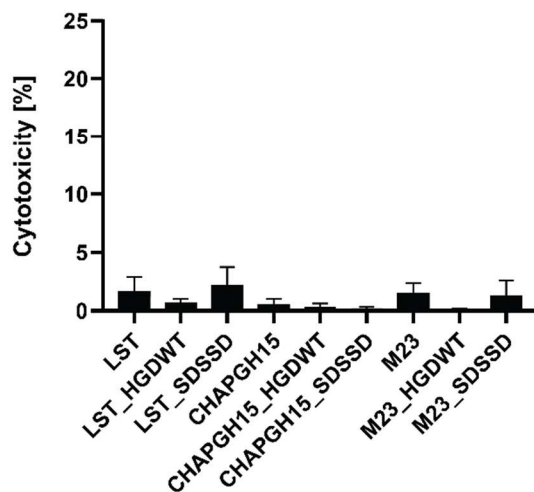

**Supplementary Figure S4: Purity and cytotoxicity of PGHs produced for the efficacy study in a murine deep wound subcutaneous infection model. (A)** Purity of proteins expressed in an endotoxin-free manner and purified by cation exchange and size exclusion chromatography was assessed by SDS-PAGE. 2  $\mu$ g of each enzyme was loaded. The PageRuler™ unstained 200 kDa ladder (Thermo Fisher Scientific, Waltham, US) was used for size reference. **(B)** Cytotoxicity of enzymes in eukaryotic cells was determined by treating MC3T3-E1 cells with 2  $\mu$ M enzyme for 4 hours and measuring LDH levels in the supernatant with the CyQuant™ LDH cytotoxicity assay kit (Invitrogen). Percentage cytotoxicity was calculated by division of the signals of the samples by the signal obtained from complete cell lysis with a detergent, and multiplication by 100%. Plotted values represent the average cytotoxicity ( $\pm$  SEM) obtained from biological triplicates.
