# Supplementary material for: Systemic application of bone-targeting peptidoglycan hydrolases as a novel treatment approach for staphylococcal bone infection
Source: PubMed Central journal article supplement (PMC10653945; doi:10.1128/mbio.01830-23), 2023-09-28
Supplement: mbio.01830-23-s0005.pdf [file mbio.01830-23-s0005.pdf]

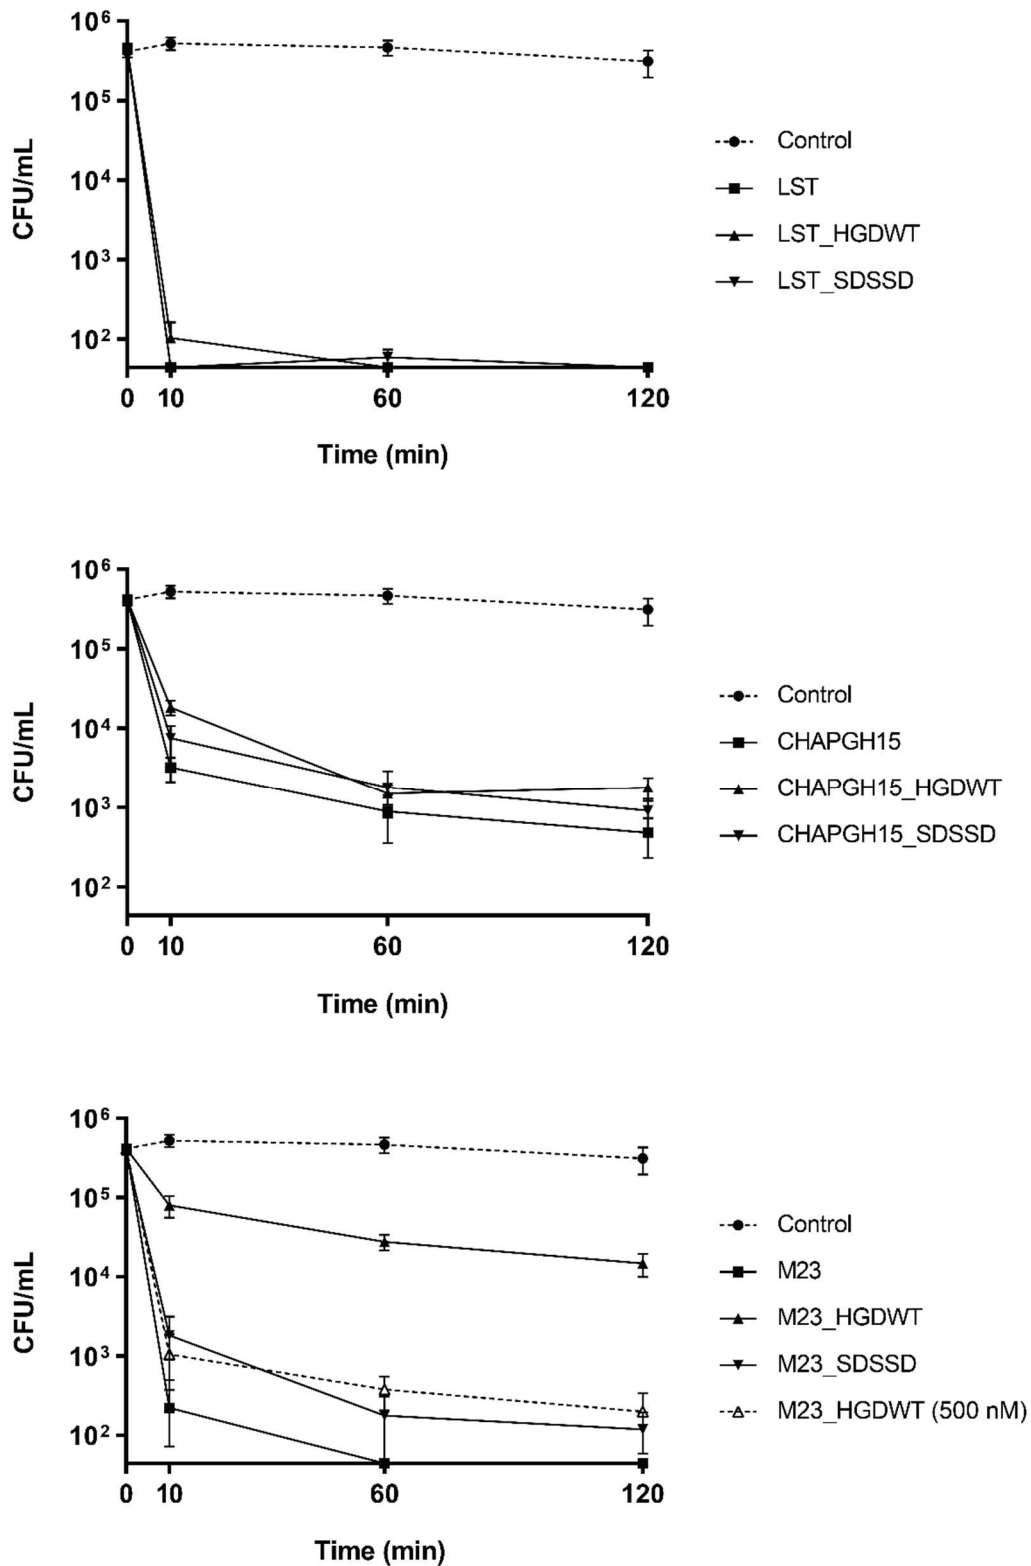

**Supplementary Figure S5: Staphylolytic activity of parental and CPHP-fused PGHs used in an efficacy study in a murine deep wound subcutaneous infection model.** *S. aureus* Cowan I (10<sup>6</sup> CFU/mL) was treated with 20 nM enzyme in murine serum. Bacterial counts were determined after 10, 60, and 120 minutes by plating. Plotted are the mean CFU/mL ( $\pm$  SEM) determined at each time point in biological triplicates. The Y-axis was cut at the detection limit (44 CFU/mL).
