# Supplementary material for: Systemic application of bone-targeting peptidoglycan hydrolases as a novel treatment approach for staphylococcal bone infection
Source: PubMed Central journal article supplement (PMC10653945; doi:10.1128/mbio.01830-23), 2023-09-28
Supplement: mbio.01830-23-s0006.pdf [file mbio.01830-23-s0006.pdf]

**Supplementary Table S1: Bacterial strains used in this study for functional assays (*S. aureus*) and expression of proteins (*E. coli*).**

| Species          | Strain               | Comments                                                   | Source                                |
|------------------|----------------------|------------------------------------------------------------|---------------------------------------|
| <i>S. aureus</i> | Newman               | Clinical isolate (MSSA)                                    | ATCC 25904 (1)                        |
| <i>S. aureus</i> | Cowan I              | Clinical isolate (MSSA)                                    | ATCC 12598 (2)                        |
| <i>S. aureus</i> | USA300 JE2           | Clinical isolate (MRSA)                                    | NARSA NR-46543 (3)                    |
| <i>E. coli</i>   | BL21-Gold(DE3)       | Tet <sup>R</sup>                                           | Agilent Technologies, Santa Clara, US |
| <i>E. coli</i>   | SURE                 | Tet <sup>R</sup> , Kan <sup>R</sup>                        | Stratagene, La Jolla, US              |
| <i>E. coli</i>   | XL1-Blue MRF'        | Tet <sup>R</sup>                                           | Stratagene, La Jolla, US              |
| <i>E. coli</i>   | ClearColi® BL21(DE3) | LTA-deficient strain for endotoxin-free protein expression | Lucigen, Middleton, US                |

Abbreviations: ATCC, American Type Culture Collection; Kan<sup>R</sup>, Kanamycin resistance; LTA, lipoteichoic acid; MRSA, methicillin-resistant *Staphylococcus aureus*; MSSA, methicillin-sensitive *Staphylococcus aureus*; NARSA, Network on Antimicrobial Resistance in *Staphylococcus aureus*; Tet<sup>R</sup>, tetracycline resistance.

1. Duthie ES, Lorenz LL. 1952. Staphylococcal coagulase; mode of action and antigenicity. *J Gen Microbiol* 6:95-107.
2. Bohacek J, Kocur M, Martinec T. 1971. Deoxyribonucleic acid base composition of serotype strains of *Staphylococcus aureus*. *J Gen Microbiol* 68:109-13.
3. Fey PD, Endres JL, Yajjala VK, Widhelm TJ, Boissy RJ, Bose JL, Bayles KW. 2013. A genetic resource for rapid and comprehensive phenotype screening of nonessential *Staphylococcus aureus* genes. *mBio* 4:e00537-12.
