# Supplementary material for: Systemic application of bone-targeting peptidoglycan hydrolases as a novel treatment approach for staphylococcal bone infection
Source: PubMed Central journal article supplement (PMC10653945; doi:10.1128/mbio.01830-23), 2023-09-28
Supplement: mbio.01830-23-s0008.pdf [file mbio.01830-23-s0008.pdf]

**Supplementary Table S3: Protein constructs created and presented in this work.** All constructs were cloned into the expression vector pET302.

| ID             | Name                     | Expression strain <sup>1</sup> | Origin <sup>2</sup> | Application <sup>3</sup> |
|----------------|--------------------------|--------------------------------|---------------------|--------------------------|
| eGFP           | H_eGFP                   | A                              | 1                   | FM                       |
| eGFP_SERSQ     | H_eGFP_L_SERSQYIPSTRT    | A                              | 1                   | FM                       |
| eGFP_QTVNL     | H_eGFP_L_QTVNLLSDVRRS    | A                              | 1                   | FM                       |
| eGFP_DGSPL     | H_eGFP_L_DGSPLPQKIHPS    | A                              | 1                   | FM                       |
| eGFP_YNTGH     | H_eGFP_L_YNTGHTPVKLHT    | A                              | 1                   | FM                       |
| eGFP_HGDWT     | H_eGFP_L_HGDWTKRWSFLA    | A                              | 1                   | FM                       |
| eGFP_GYPPG     | H_eGFP_L_GYPPGAGHANTL    | A                              | 1                   | FM                       |
| eGFP_TPLFT     | H_eGFP_L_TPLFTQEATGAN    | A                              | 1                   | FM                       |
| eGFP_MTPTA     | H_eGFP_L_MTPTANTCVRCN    | A                              | 1                   | FM                       |
| eGFP_LSWSQ     | H_eGFP_L_LSWSQTQGVSSST   | A                              | 1                   | FM                       |
| eGFP_SIAED     | H_eGFP_L_SIAEDQTISTPK    | A                              | 1                   | FM                       |
| eGFP_TAT       | H_eGFP_L_TAT             | A                              | 1                   | FM                       |
| LST            | LST                      | A/B                            | 2                   | AA/BD/ES                 |
| LST_SERSQ      | LST_SERSQYIPSTRT         | A/B                            | 1                   | AA/BD                    |
| LST_QTVNL      | LST_QTVNLLSDVRRS         | A                              | 1                   | AA                       |
| LST_DGSPL      | LST_DGSPLPQKIHPS         | A                              | 1                   | AA                       |
| LST_YNTGH      | LST_YNTGHTPVKLHT         | A                              | 1                   | AA                       |
| LST_HGDWT      | LST_HGDWTKRWSFLA         | A/B                            | 1                   | AA/BD/ES                 |
| LST_GYPPG      | LST_GYPPGAGHANTL         | A                              | 1                   | AA                       |
| LST_TPLFT      | LST_TPLFTQEATGAN         | A                              | 1                   | AA                       |
| LST_MTPTA      | LST_MTPTANTCVRCN         | A/B                            | 1                   | AA/BD                    |
| LST_LSWSQ      | LST_LSWSQTQGVSSST        | A                              | 1                   | AA                       |
| LST_SIAED      | LST_SIAEDQTISTPK         | A                              | 1                   | AA                       |
| LST_SDSSD      | LST_SDSSD                | A/B                            | 1                   | AA/BD/ES                 |
| LST_DSS6       | LST_DSS6                 | A                              | 1                   | AA                       |
| LST_TAT        | LST_TAT                  | A/B                            | 2                   | AA                       |
| M23            | M23LST(L)_SH3b2638       | A/B                            | 2                   | AA/ES                    |
| M23_HGDWT      | M23LST(L)_SH3b2638_HGDWT | B                              | 1                   | AA/ES                    |
| M23_SDSSD      | M23LST(L)_SH3b2638_SDSSD | B                              | 1                   | AA/ES                    |
| CHAPGH15       | CHAPGH15_SH3bALE1        | B                              | 2                   | AA/ES                    |
| CHAPGH15_HGDWT | CHAPGH15_SH3bALE1_HGDWT  | B                              | 1                   | AA/ES                    |
| CHAPGH15_SDSSD | CHAPGH15_SH3bALE1_SDSSD  | B                              | 1                   | AA/ES                    |

<sup>1</sup> Expression strains: A, *E. coli* BL21-Gold(DE3); B, *E. coli* ClearColi® BL21(DE3).

<sup>2</sup> Origin of construct: 1, this study; 2, strain collection of Laboratory of Food Microbiology, ETH Zurich, Zurich.

<sup>3</sup> Application: FM, fluorescence microscopy; AA, activity assays; BD, biodistribution; ES, efficacy study.
