# Supplementary material for: Systemic application of bone-targeting peptidoglycan hydrolases as a novel treatment approach for staphylococcal bone infection
Source: PubMed Central journal article supplement (PMC10653945; doi:10.1128/mbio.01830-23), 2023-09-28
Supplement: mbio.01830-23-s0009.pdf [file mbio.01830-23-s0009.pdf]

**Supplementary Table S4: PCR primers used in this study.**

| ID                                       | Sequence (5' - 3')                                                                 | Application                                                                                                                        |
|------------------------------------------|------------------------------------------------------------------------------------|------------------------------------------------------------------------------------------------------------------------------------|
| M13_PhD_Insert_F                         | TTCGCAATTCCTTTAGTGGT                                                               | Amplification of surface-displayed 12-mer peptide region in phage M13 genome of phage display-selected pools (Illumina sequencing) |
| M13_PhD_Insert_R                         | AAGTTTTGTCGTCTTTCCAG                                                               |                                                                                                                                    |
| T7 seq                                   | GAAATTAATACGACTCACTATAGGG                                                          | Amplification of MCS in pET302, sequencing primers (Sanger sequencing)                                                             |
| pET RP                                   | CTAGTTATTGCTCAGCGG                                                                 |                                                                                                                                    |
| <i>NdeI</i> _LST_F                       | TTTCATATGGCAGCAACCCATGAACA<br>T                                                    | Amplification of LST from pET302_LST and 5' incorporation of <i>NdeI</i> restriction site                                          |
| LST_ <i>SacI</i> _SERSQ_ <i>BamHI</i> _R | GCCGGATCCTTAGGTACGTGTGCTC<br>GGAATATACTGGCTACGTTCTGAGAG<br>CTCTTTGATGGTGCCCCACAGAA | Amplification of LST from pET302_LST and 3' incorporation of CPHP and <i>BamHI</i> restriction site                                |
| LST_ <i>SacI</i> _QTVNL_ <i>BamHI</i> _R | GCCGGATCCTTAGCTACGACGAACAT<br>CACTCAGCAGATTAACGGTCTGGAG<br>CTCTTTGATGGTGCCCCACAGAA |                                                                                                                                    |
| LST_ <i>SacI</i> _DGSPL_ <i>BamHI</i> _R | GCCGGATCCTTAGCTCGGATGAATTT<br>TCTGCGGCAGCGACTGCCATCGAG<br>CTCTTTGATGGTGCCCCACAGAA  |                                                                                                                                    |
| LST_ <i>SacI</i> _YNTGH_ <i>BamHI</i> _R | GCCGGATCCTTAGGTGTGCAGTTTAA<br>CCGGTGTATGACCTGTATTATAGAGC<br>TCTTTGATGGTGCCCCACAGAA |                                                                                                                                    |
| LST_ <i>SacI</i> _HGDWT_ <i>BamHI</i> _R | GCCGGATCCTTATGCCAGAAACCAG<br>CTACGTTTGGTCCAATCACCATGGAG<br>CTCTTTGATGGTGCCCCACAGAA |                                                                                                                                    |
| LST_ <i>SacI</i> _GYPPG_ <i>BamHI</i> _R | GCCGGATCCTTACAGGGTATTTGCAT<br>GACCTGCACCAGGCGGATAACCGAG<br>CTCTTTGATGGTGCCCCACAGAA |                                                                                                                                    |
| LST_ <i>SacI</i> _TPLFT_ <i>BamHI</i> _R | GCCGGATCCTTAATTTGCGCCTGTTG<br>CTTCTTGGGTAACAGCGGTGTGAG<br>CTCTTTGATGGTGCCCCACAGAA  |                                                                                                                                    |
| LST_ <i>SacI</i> _MTPTA_ <i>BamHI</i> _R | GCCGGATCCTTAATTACAACGAACAC<br>AGGTATTTGCGGTGCGGGTCATGAG<br>CTCTTTGATGGTGCCCCACAGAA |                                                                                                                                    |
| LST_ <i>SacI</i> _LSWSQ_ <i>BamHI</i> _R | GCCGGATCCTTAGGTGCTGCTAACA<br>CCCTGGGTCTGTGACCAGCTCAGGA<br>GCTCTTTGATGGTGCCCCACAGAA |                                                                                                                                    |
| LST_ <i>SacI</i> _SIAED_ <i>BamHI</i> _R | GCCGGATCCTTATTTGCGGGTGCTAA<br>TGGTCTGATCTTCTGCAATTGAGAGC<br>TCTTTGATGGTGCCCCACAGAA |                                                                                                                                    |
| LST_ <i>SacI</i> _SDSSD_ <i>BamHI</i> _R | GCCGGATCCTTAATCACTGCTATCGC<br>TGAGCTCTTTGATGGTGCCCCACAGA<br>A                      |                                                                                                                                    |

Abbreviations: CPHP, cell-penetrating homing peptide; F, forward primer; MCS, multiple cloning site; R, reverse primer.
